# Supplementary material
Source: HighWire-hosted journal article supplement (https://www.cmaj.ca/highwire/filestream/59769/field_highwire_adjunct_files/2/151447-res-3-at.pdf)
Supplement: 151447-res-3-at.pdf [file 151447-res-3-at.pdf]

**Appendix 3 (as supplied by the authors): Risk associated with total score**

| <b>Point total</b> | <b>Estimate risk of AKI-RRT associated with total score</b> | <b>Point total</b> | <b>Estimate risk of AKI-RRT associated with total score</b> |
|--------------------|-------------------------------------------------------------|--------------------|-------------------------------------------------------------|
| 0                  | 0.0004                                                      | 24                 | 0.0872                                                      |
| 1                  | 0.0008                                                      | 25                 | 0.1050                                                      |
| 2                  | 0.0010                                                      | 26                 | 0.1261                                                      |
| 3                  | 0.0013                                                      | 27                 | 0.1506                                                      |
| 4                  | 0.0015                                                      | 28                 | 0.1789                                                      |
| 5                  | 0.0019                                                      | 29                 | 0.2112                                                      |
| 6                  | 0.0023                                                      | 30                 | 0.2477                                                      |
| 7                  | 0.0029                                                      | 31                 | 0.2880                                                      |
| 8                  | 0.0035                                                      | 32                 | 0.3321                                                      |
| 9                  | 0.0043                                                      | 33                 | 0.3793                                                      |
| 10                 | 0.0053                                                      | 34                 | 0.4289                                                      |
| 11                 | 0.0065                                                      | 35                 | 0.4800                                                      |
| 12                 | 0.0080                                                      | 36                 | 0.5315                                                      |
| 13                 | 0.0098                                                      | 37                 | 0.5824                                                      |
| 14                 | 0.0120                                                      | 38                 | 0.6315                                                      |
| 15                 | 0.0147                                                      | 39                 | 0.6781                                                      |
| 16                 | 0.0180                                                      | 40                 | 0.7214                                                      |
| 17                 | 0.0220                                                      | 41                 | 0.7609                                                      |
| 18                 | 0.0270                                                      | 42                 | 0.7964                                                      |
| 19                 | 0.0329                                                      | 43                 | 0.8278                                                      |
| 20                 | 0.0402                                                      | 44                 | 0.8552                                                      |
| 21                 | 0.0489                                                      | 45                 | 0.8789                                                      |
| 22                 | 0.0595                                                      | 46                 | 0.8992                                                      |
| 23                 | 0.0721                                                      |                    |                                                             |
